# Supplementary material for: Associations of genetic polymorphisms in pTEN/AKT/mTOR signaling pathway genes with cancer risk: A meta-analysis in Asian population
Source: PubMed Central journal article supplement (PMC5736732; doi:10.1038/s41598-017-17250-z), 2017-12-19
Supplement: 41598_2017_17250_MOESM1_ESM.pdf [file 41598_2017_17250_MOESM1_ESM.pdf]

## **Supplemental Information (SI)**

### **Associations of genetic polymorphisms in pTEN/AKT/mTOR signaling pathway genes with cancer risk: A meta-analysis in Asian population**

Zhen Zhang, Qiuchen Chen, Jing Zhang, Yilin Wang, Xiaoyun Hu, Sainan Yin, Miao He, Shu Guan, Wenyan Qin, Qinghuan Xiao, Haishan Zhao, Weifan Yao, Huizhe Wu, and Minjie Wei

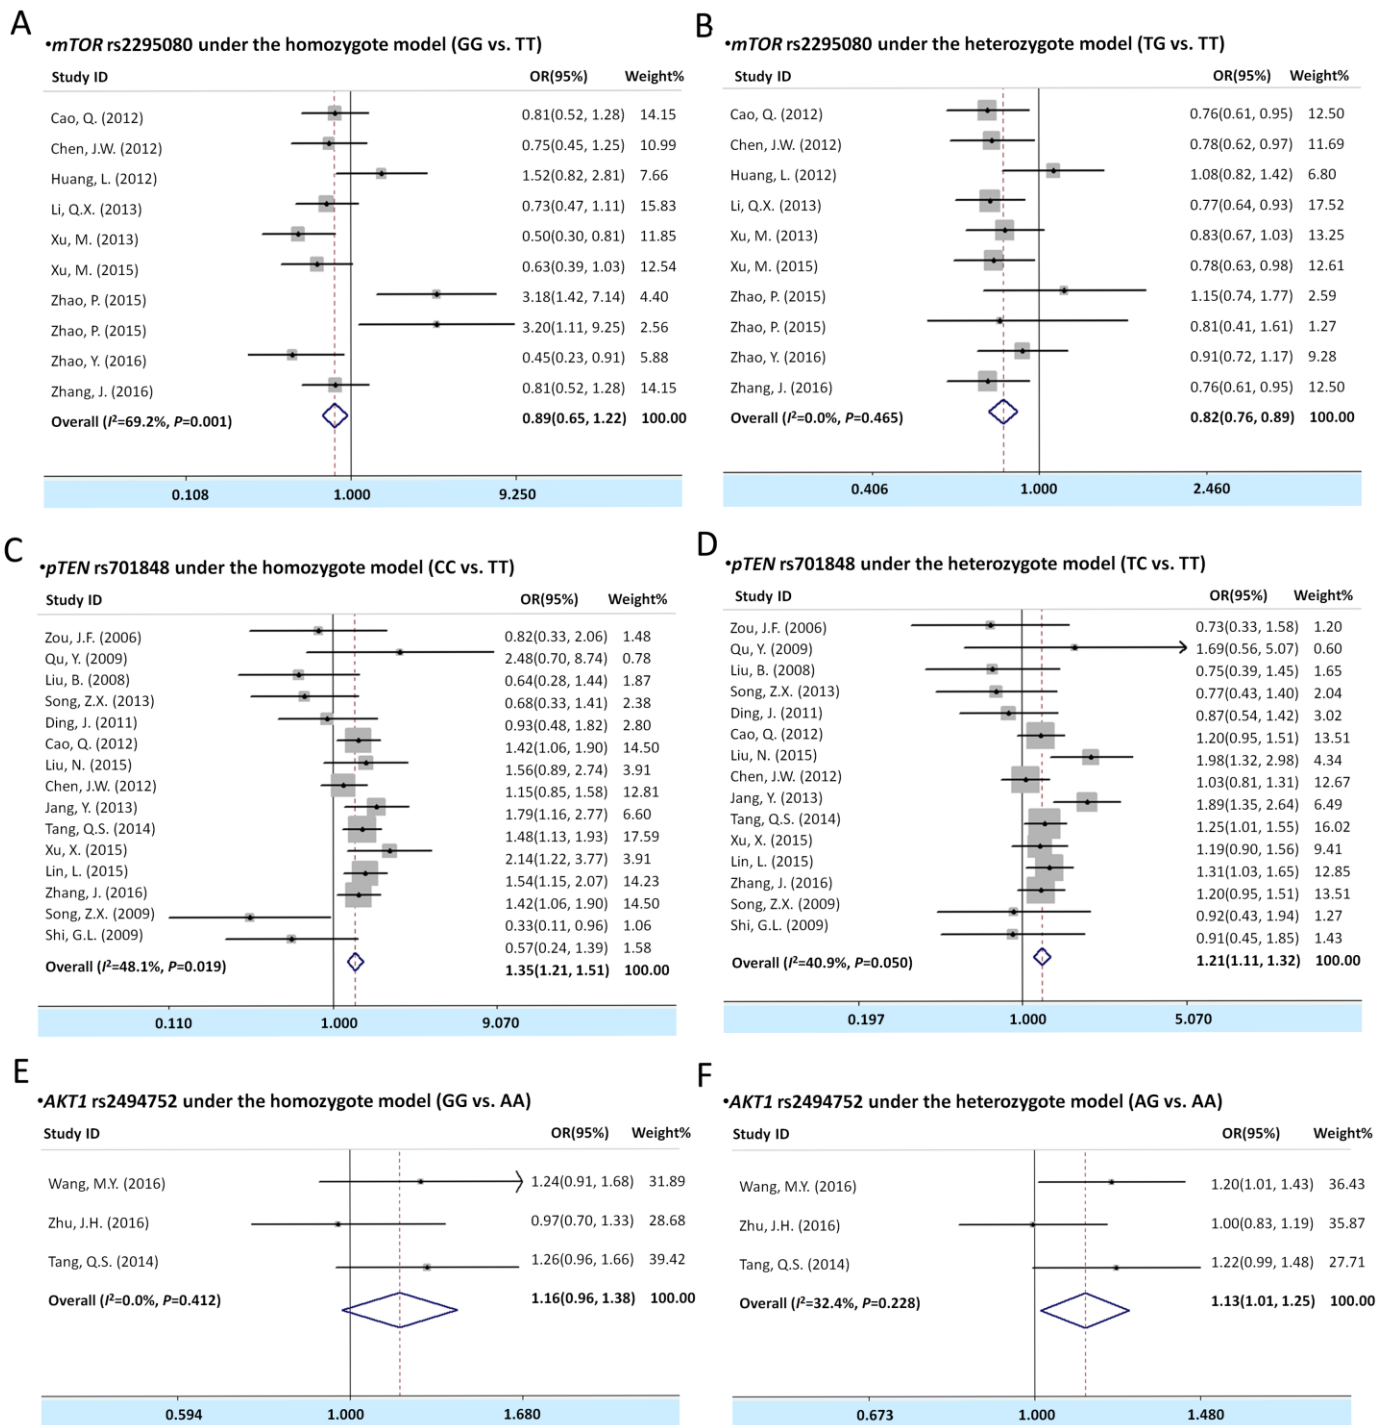

**Figure S1.** Forest plots of cancer risk with polymorphism of *mTOR* rs2529080 (A,B), *pTEN* rs701848 (C,D) and *AKT1* rs2494752 (E,F) assessing by overall analysis under the homozygote model (A,C,E), heterozygote model (B,D,F). The estimates of OR(95%CI) are plotted with a box and a horizontal line for each study.  $\diamond$ , pooled ORs (95% CIs).

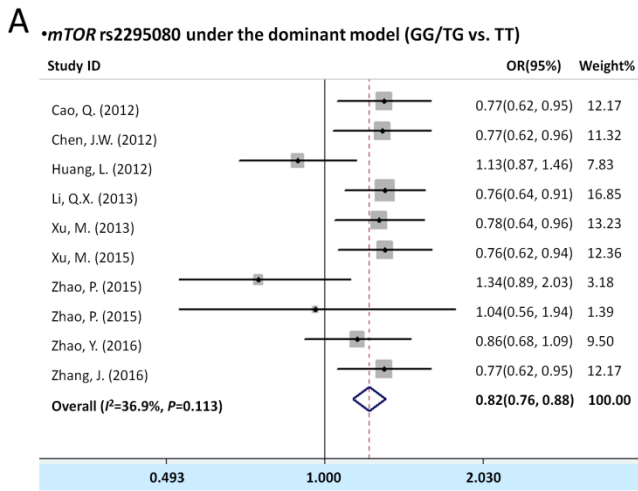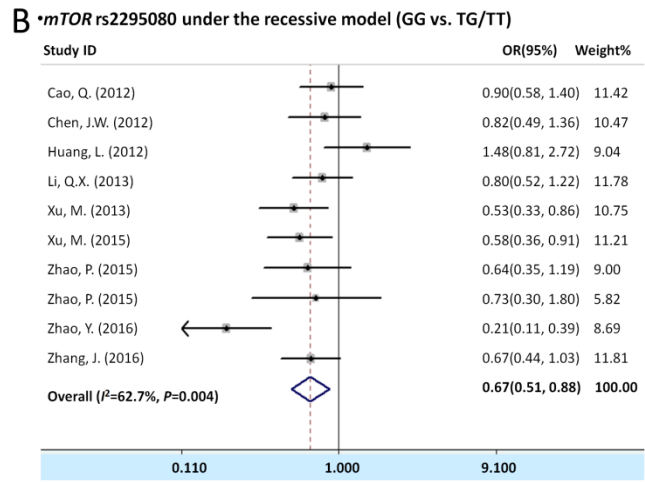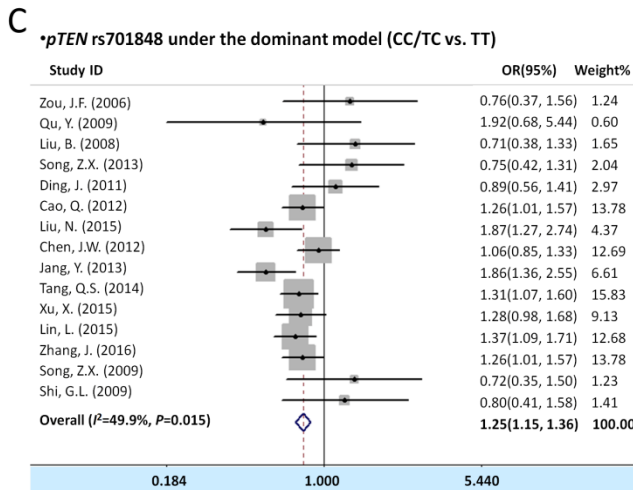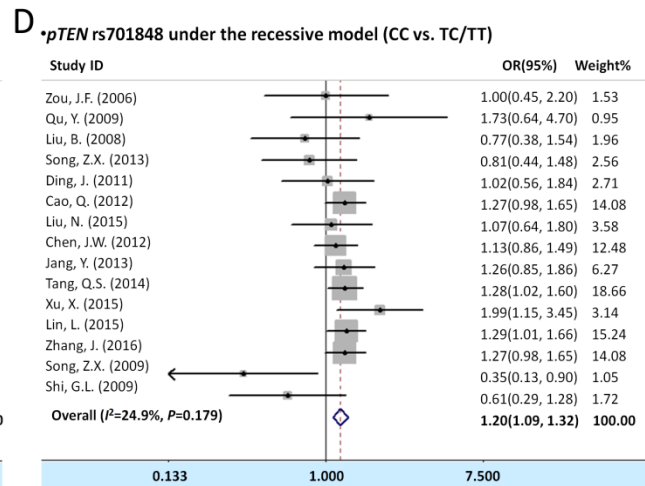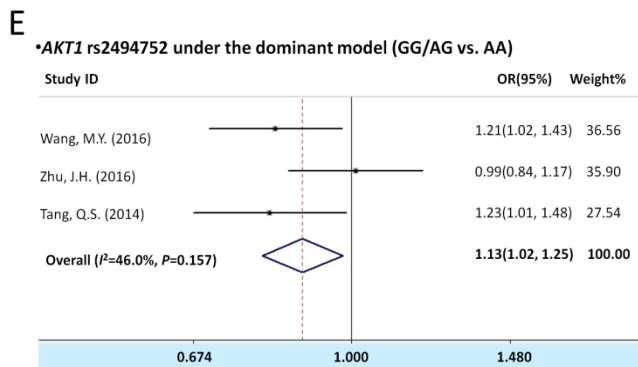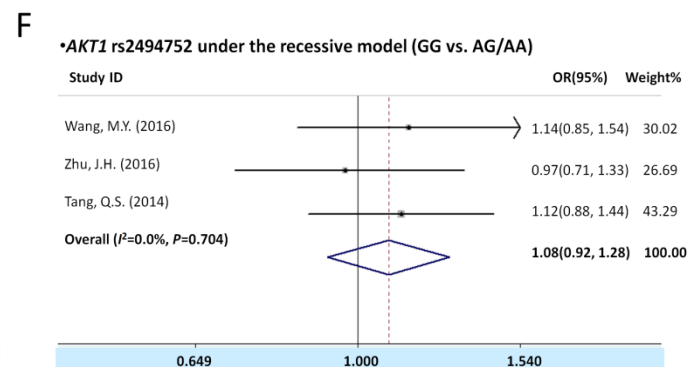

**Figure S2.** Forest plots of cancer risk with polymorphism of *mTOR* rs2529080 (A,B), *pTEN* rs701848 (C,D) and *AKT1* rs2494752 (E,F) assessing by overall analysis under the dominant model (A,C,E) and recessive model (B,D,F). The estimates of OR(95% CIs) are plotted with a box and a horizontal line for each study.  $\diamond$ , pooled ORs (95% CIs).

**Table S1. Meta-analysis of the association between genetic polymorphisms of PTEN/AKT/mTOR pathway and cancer risk**

| Variables                            | No. of cases/controls | $P^z$        | Homozygous OR (95%CI)     | $P^{het\#}$ | $I^2\#$ (%) | $P^z$        | Heterozygous OR (95%CI)   | $P^{het\#}$ | $I^2\#$ (%) |
|--------------------------------------|-----------------------|--------------|---------------------------|-------------|-------------|--------------|---------------------------|-------------|-------------|
| <b><i>mTOR</i> rs2295080</b>         |                       |              | <b>GG vs. TT</b>          |             |             |              | <b>TG vs. TT</b>          |             |             |
| Urinary system cancer <sup>†</sup>   | 4203/4392             | 0.070        | 0.832(0.681,1.015)        | 0.787       | 0.0         | <b>0.030</b> | <b>0.832(0.705,0.982)</b> | 0.011       | 69.4        |
| Blood system cancer <sup>§</sup>     | 5971/1146             | <b>0.003</b> | <b>2.250(1.327,3.815)</b> | 0.264       | 24.8        | 0.574        | 1.065(0.855,1.327)        | 0.691       | 0.0         |
| Digestive system cancer <sup>¶</sup> | 3605/3747             | 0.169        | 0.777(0.542,1.113)        | 0.059       | 59.6        | 0.785        | 0.972(0.795,1.189)        | 0.005       | 76.3        |
| <b>Overall</b>                       | 8965/9868             | 0.449        | 0.913(0.722,1.155)        | 0.001       | 62.6        | 0.104        | 0.915(0.821,1.019)        | 0.001       | 64.5        |
| <b><i>pTEN</i> rs701848</b>          |                       |              | <b>CC vs. TT</b>          |             |             |              | <b>TC vs. TT</b>          |             |             |
| Oral cavity cancer <sup>¥</sup>      | 331/356               | 0.452        | 0.831(0.512,1.347)        | 0.312       | 16.0        | 0.292        | 0.823(0.572,1.183)        | 0.603       | 0.0         |
| Digestive system cancer              | 2418/2662             | 0.387        | 1.191(0.802,1.769)        | 0.000       | 77.6        | 0.108        | 1.235(0.955,1.598)        | 0.001       | 73.3        |
| Urinary system cancer                | 2086/2228             | <b>0.001</b> | <b>1.331(1.120,1.582)</b> | 0.561       | 0.0         | <b>0.049</b> | <b>1.145(1.000,1.310)</b> | 0.593       | 0.0         |
| <b>Overall</b>                       | 5882/6284             | 0.098        | 1.180(0.970, 1.435)       | 0.000       | 62.6        | <b>0.030</b> | <b>1.154(1.014,1.313)</b> | 0.010       | 51.1        |

\*  $P^z$ : the significance of the pooled OR was determined by Z-test, and  $P < 0.05$  was considered as statistically significant.

#  $P^{het}$  and  $I^2$  were calculated by Chi square-based Q-test.

†Urinary system cancer: renal cancer, prostate cancer; § Blood system cancer: acute lymphocytic leukemia, acute myeloid leukemia; ¶Digestive system cancer: gastric cancer, ESCC, hepatocellular cancer, colorectal cancer; ¥Oral cavity cancer: laryngo cancer; \$Reproductive system cancer: endometrial cancer.

**Table S2. Meta-analysis of the association between genetic polymorphisms of PTEN/AKT/mTOR pathway and cancer risk by recessive and dominant models**

| Variables                    | <i>Pz</i> *  | Recessive<br>OR (95%CI)   | <i>Phet</i> # | <i>I2</i> #<br>(%) | <i>Pz</i> *  | Dominant<br>OR (95%CI)    | <i>Phet</i> # | <i>I2</i> #<br>(%) |
|------------------------------|--------------|---------------------------|---------------|--------------------|--------------|---------------------------|---------------|--------------------|
| <b><i>mTOR</i> rs2295080</b> |              | <b>GG/TG vs. TT</b>       |               |                    |              | <b>GG vs. TG/TT</b>       |               |                    |
| Urinary system cancer†       | 0.225        | 0.885(0.727,1.078)        | 0.953         | 0.0                | 0.118        | 0.699(0.446,1.095)        | 0.000         | 96.3               |
| Blood system cancer§         | <b>0.004</b> | <b>2.253(1.300,3.904)</b> | 0.227         | 32.6               | 0.142        | 1.169(0.949,1.440)        | 0.722         | 0.0                |
| Digestive system cancer ¶    | 0.111        | 0.788(0.588,1.056)        | 0.168         | 40.6               | <b>0.014</b> | <b>0.491(0.279,0.865)</b> | 0.000         | 97.6               |
| <b>Overall</b>               | 0.574        | 0.939(0.756,1.168)        | 0.005         | 57.7               | 0.020        | 0.707(0.527,0.948)        | 0.000         | 96.1               |
| <b><i>pTEN</i> rs701848</b>  |              | <b>CC/ TC vs. TT</b>      |               |                    |              | <b>CC vs. TC/TT</b>       |               |                    |
| Oral cavity cancer¥          | 0.674        | 0.924(0.639,1.336)        | 0.568         | 0.0                | 0.250        | 0.818(0.581,1.152)        | 0.409         | 0.0                |
| Digestive system cancer      | 0.195        | 1.106(0.950,1.288)        | 0.008         | 65.7               | 0.160        | 1.215(0.926,1.594)        | 0.000         | 78.4               |
| Urinary system cancer        | <b>0.008</b> | <b>1.229(1.054,1.432)</b> | 0.784         | 0.0                | <b>0.006</b> | <b>1.195(1.053,1.357)</b> | 0.476         | 0.0                |
| <b>Overall</b>               | <b>0.003</b> | <b>1.154(1.051,1.267)</b> | 0.039         | 42.2               | <b>0.042</b> | <b>1.156(1.005,1.328)</b> | 0.001         | 62.0               |

\**Pz*: the significance of the pooled OR was determined by Z-test, and  $P < 0.05$  was considered as statistically significant.

# *Phet* and *I2* were calculated by Chi square-based Q-test.

†Urinary system cancer: renal cancer, prostate cancer; § Blood system cancer: acute lymphocytic leukemia, acute myeloid leukemia; ¶ Digestive system cancer: gastric cancer, ESCC, hepatocellular cancer, colorectal cancer; ¥Oral cavity cancer: laryngo cancer; \$Reproductive system cancer: endometrial cancer.
